# Supplementary material
Source: publisher site journal article supplement (https://www.dovepress.com/article/104707)
Supplement: Supplementary file 1 [file get_supplementary_file.php]

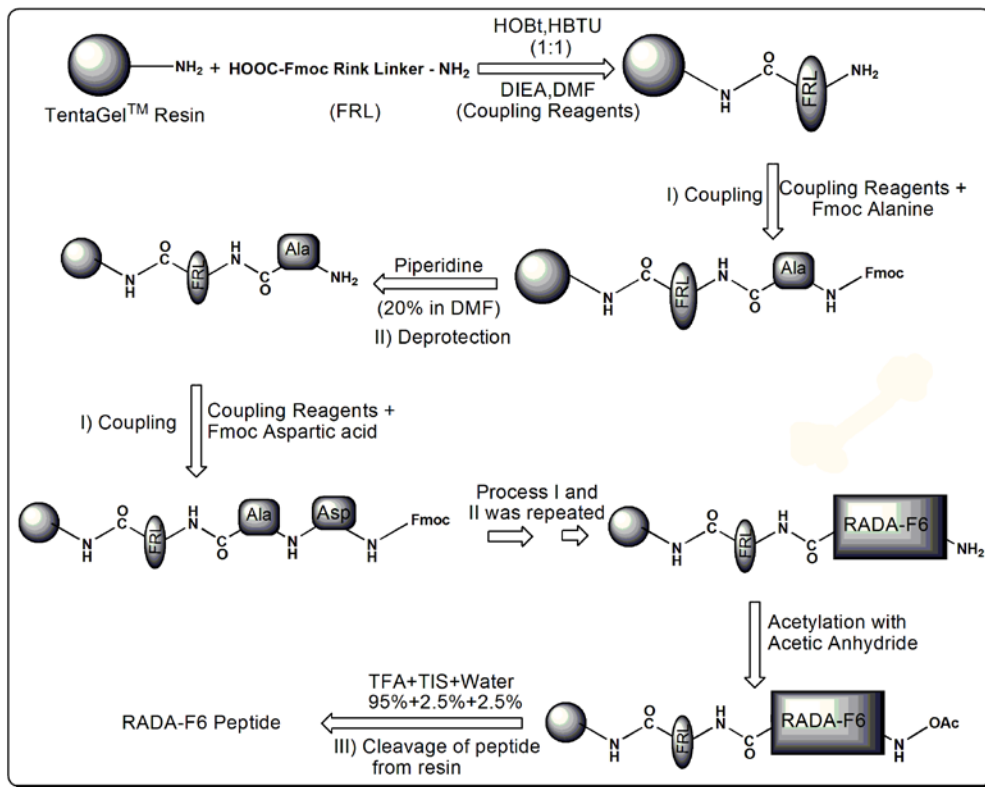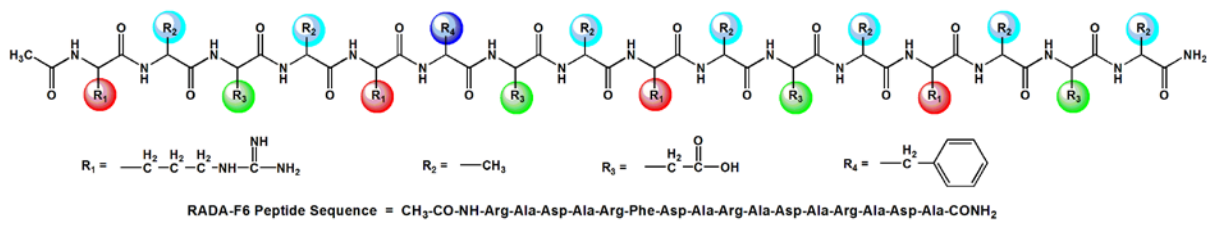

**Fig.S1.** Synthetic scheme and structural representation of RADA-F6 peptide sequence

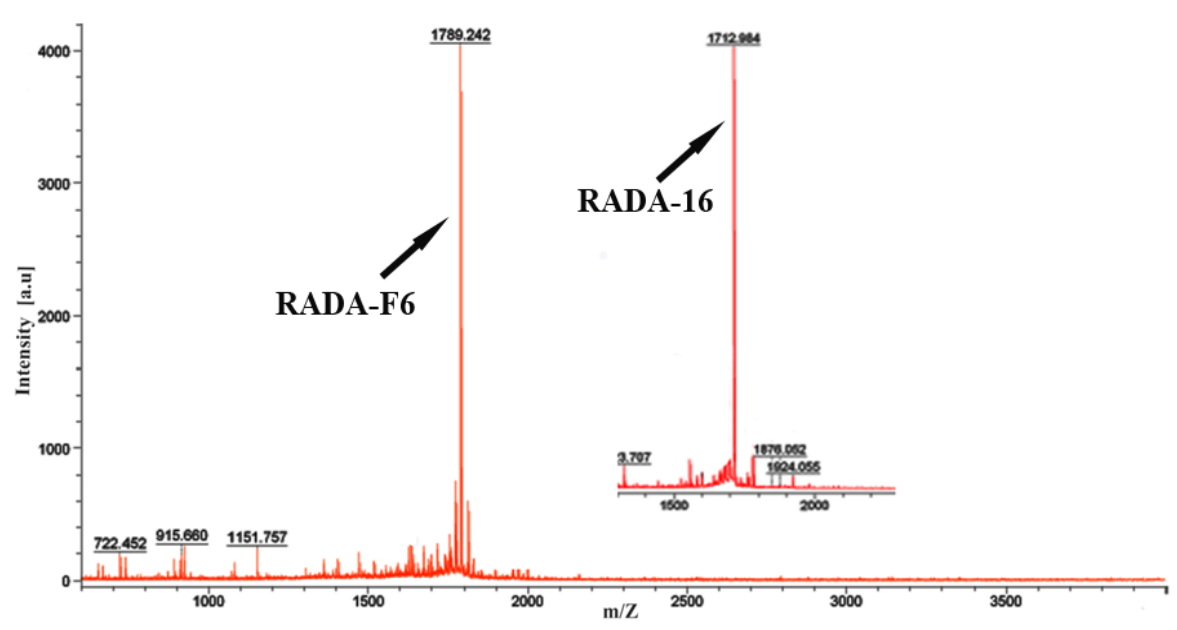

**Fig. S2.** MALDI-TOF of synthesised peptides

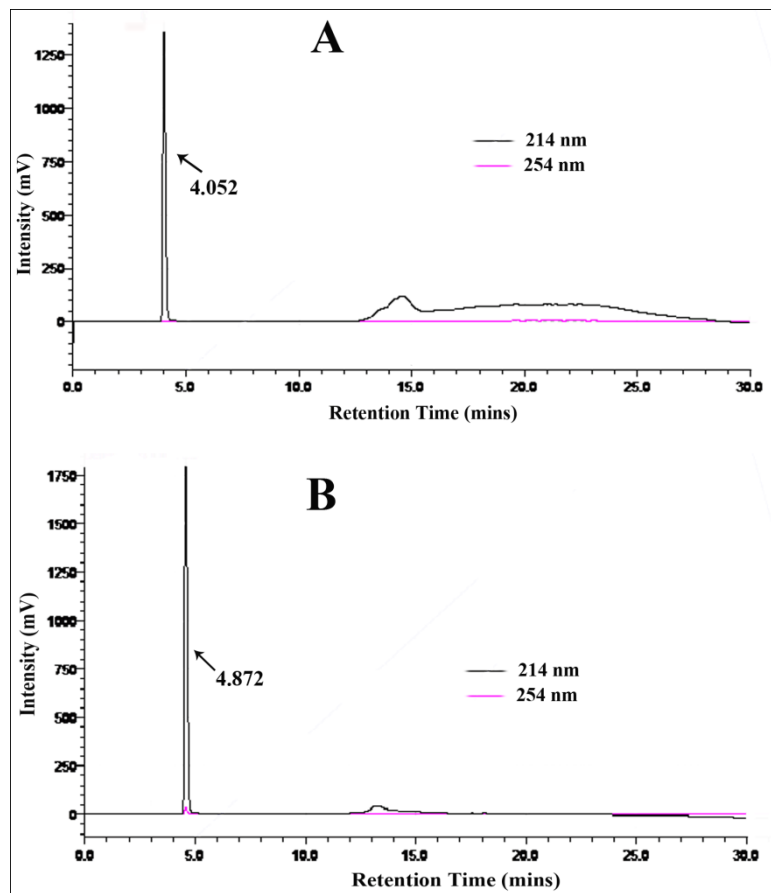

**Fig. S3.** A) RP-HPLC profile of RADA-16 B) RP-HPLC profile of RADA-F6  
HPLC conditions: C-18 column; buffer (A) 0.1 % TFA in water:acetonitrile (19:1,v/v) and buffer (B) 0.08 % TFA in acetonitrile:water ( 4:1, v/v). Flow rate 1mL/min: gradient used 0% B in 5 min. 100% B in 25 min. and 100% B in 30 min.

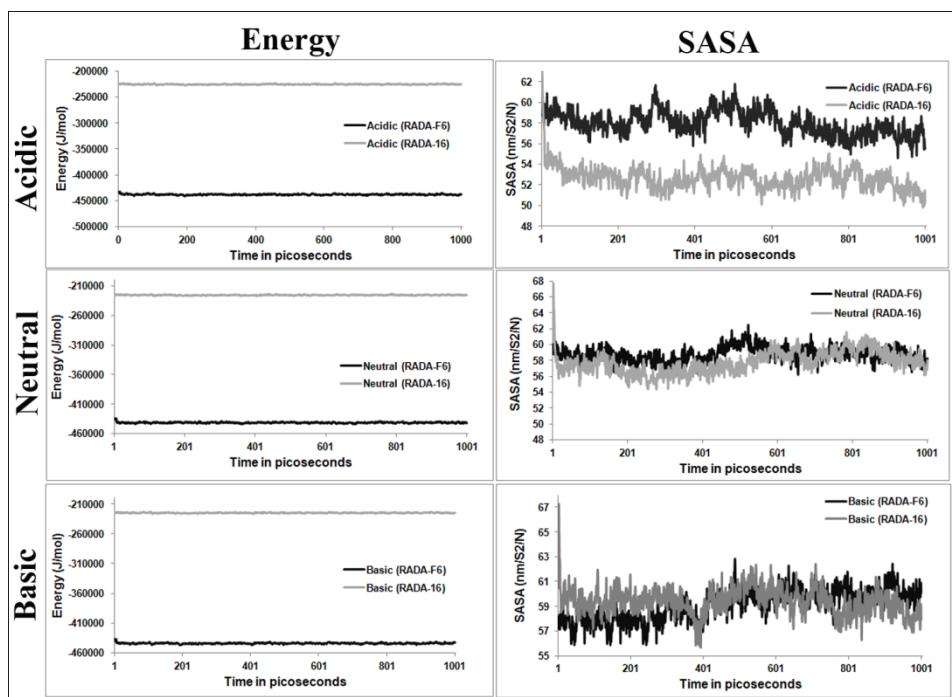

**Fig. S4.** Comparison of Energy and SASA of RADA-F6 and RADA-16 for 1000 picoseconds at different pH conditions [acidic (pH=2), neutral (pH=7) and basic (pH=7.8)].

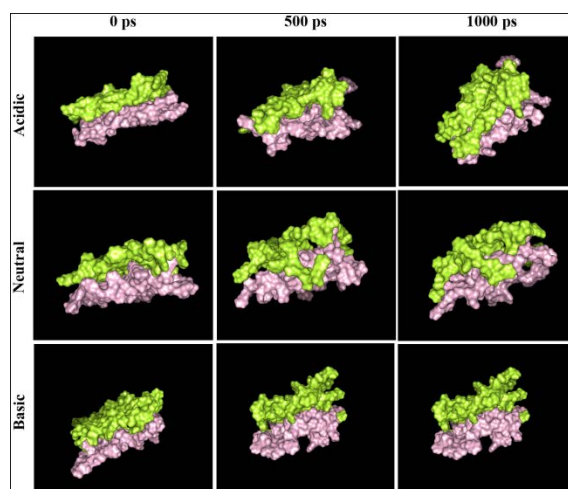

**Fig. S5 -** Dynamic behaviour of peptide nanofibrous scaffolds of RADA-F6 during pH dependent self assembly

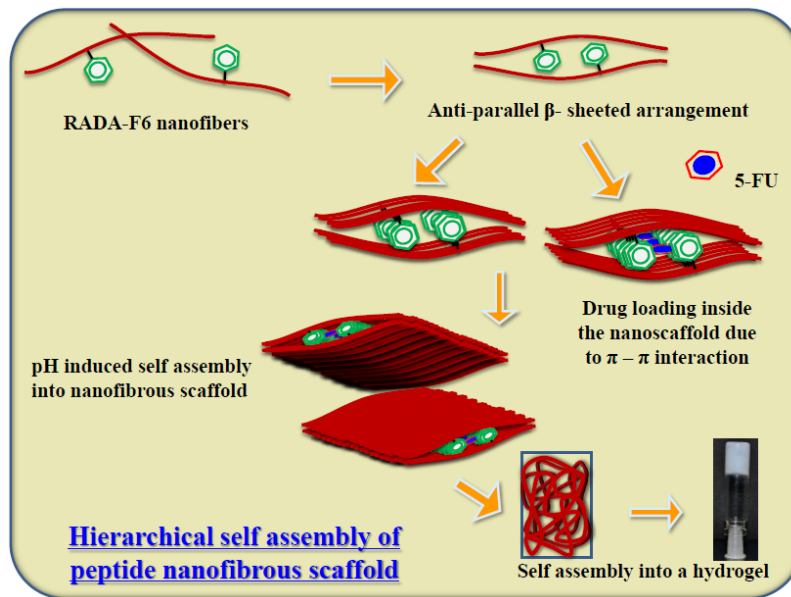

**Fig. S6-** Schematic representation of hierarchical self assembly of peptide nanofibrous scaffold with and without 5-FU
